# Supplementary material for: Enabling methanol oxidation by an interacting hybrid nanosystem of spinel Co3O4 nanoparticle decorated MXenes
Source: Royal Society of Chemistry journal article supplement (doi:10.1039/d1dt03671h), 2022-01-01
Supplement: d1dt03671h1.pdf [file d1dt03671h1.pdf]

## Enabling methanol oxidation by interacting hybrid quantum system of spinel $\text{Co}_3\text{O}_4$ nanoparticles decorated MXene

Kashmiri Baruah, Pritam Deb

Department of Physics, Tezpur University (Central University), Napaam, Tezpur, 784028, Assam,

India

### Supplementary Information

#### Results

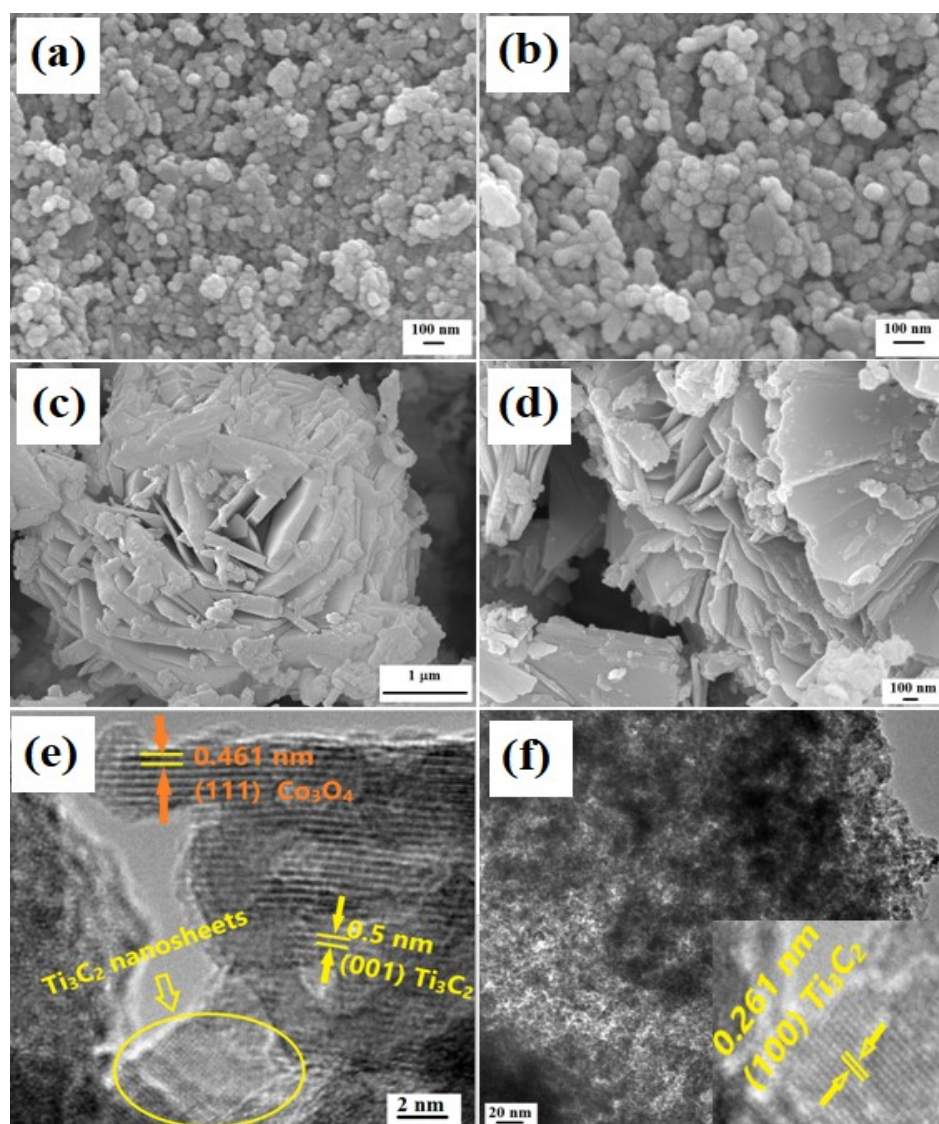

Figure S1: FESEM images of (a), (b)  $\text{Co}_3\text{O}_4$  nanoparticles; (c), (d)  $\text{Ti}_3\text{C}_2/\text{Co}_3\text{O}_4$ ; (e)-(f) HRTEM images of  $\text{Ti}_3\text{C}_2/\text{Co}_3\text{O}_4$ . (Inset in fig. f is the lattice fringes of  $\text{Ti}_3\text{C}_2$  nanosheets shown inside circle in fig. e)

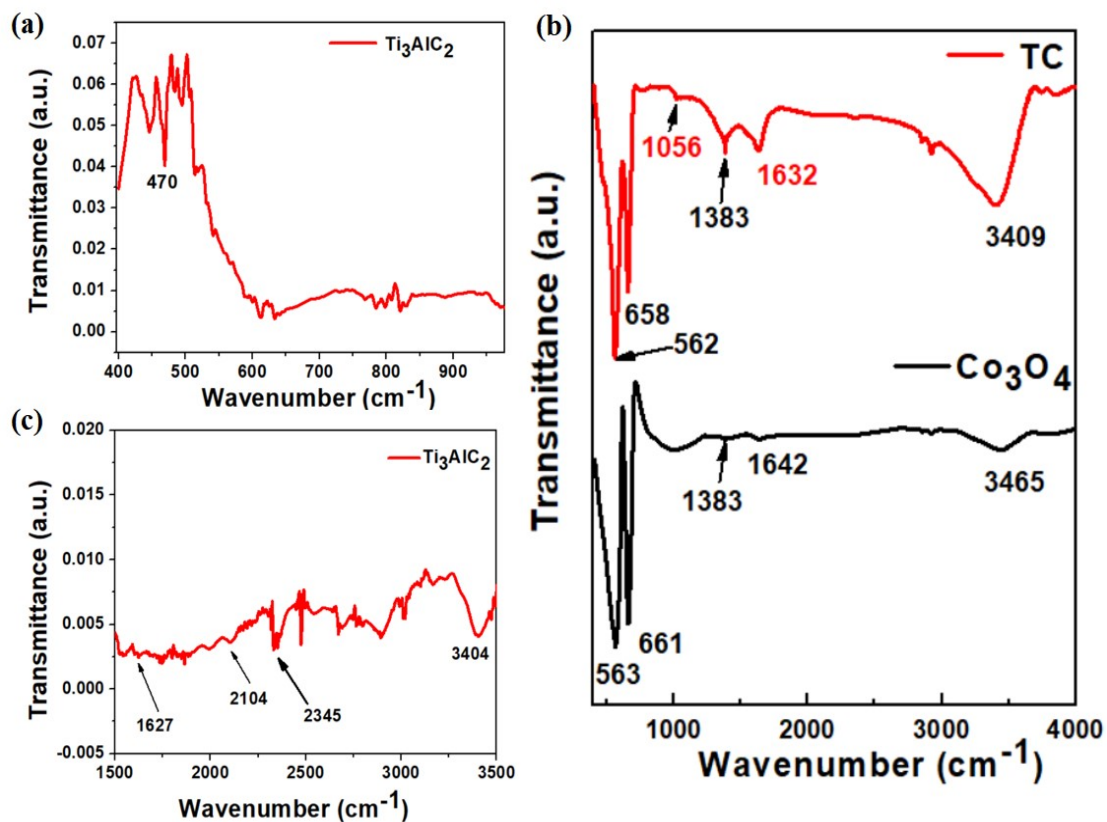

Figure S2: FTIR spectra of (a), (c)  $\text{Ti}_3\text{AlC}_2$ , and (b)  $\text{Co}_3\text{O}_4$  nanoparticles and nanocomposite TC.

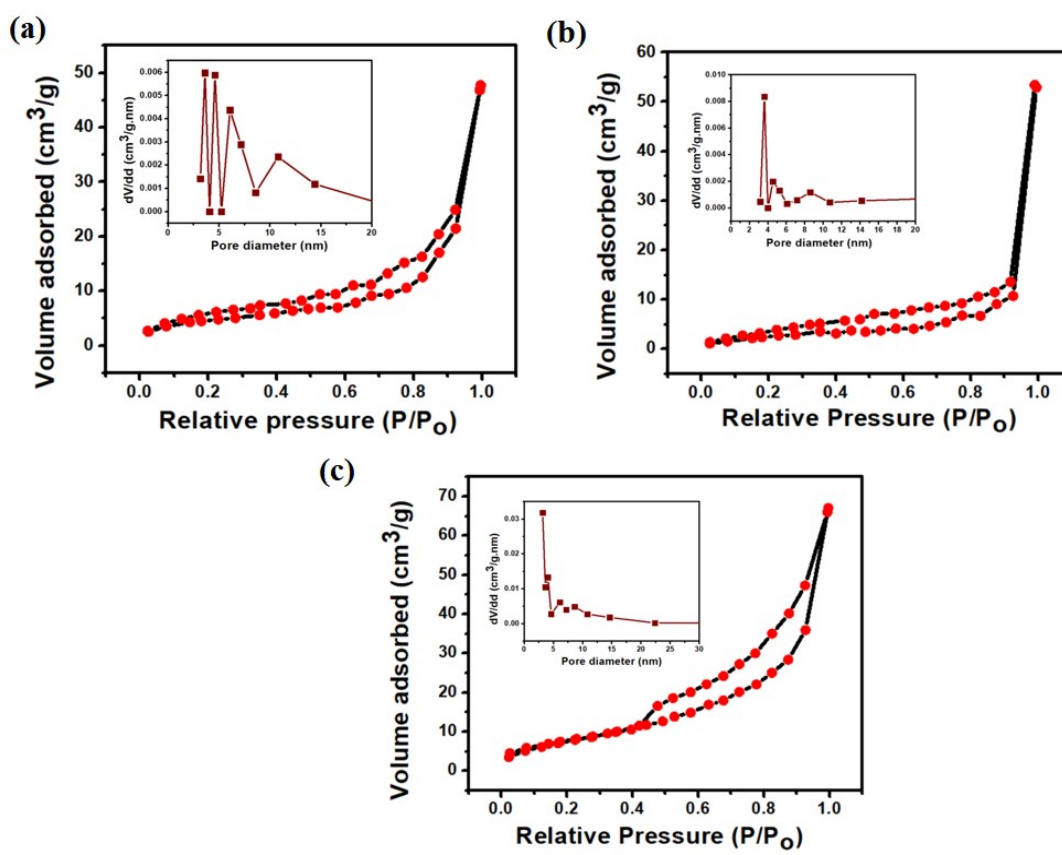

Figure S3: N<sub>2</sub> adsorption-desorption isotherms of (a) Ti<sub>3</sub>C<sub>2</sub>, (b) Co<sub>3</sub>O<sub>4</sub> and (c) TC nanocomposite. Pore size distribution curves of the corresponding samples are shown in inset.

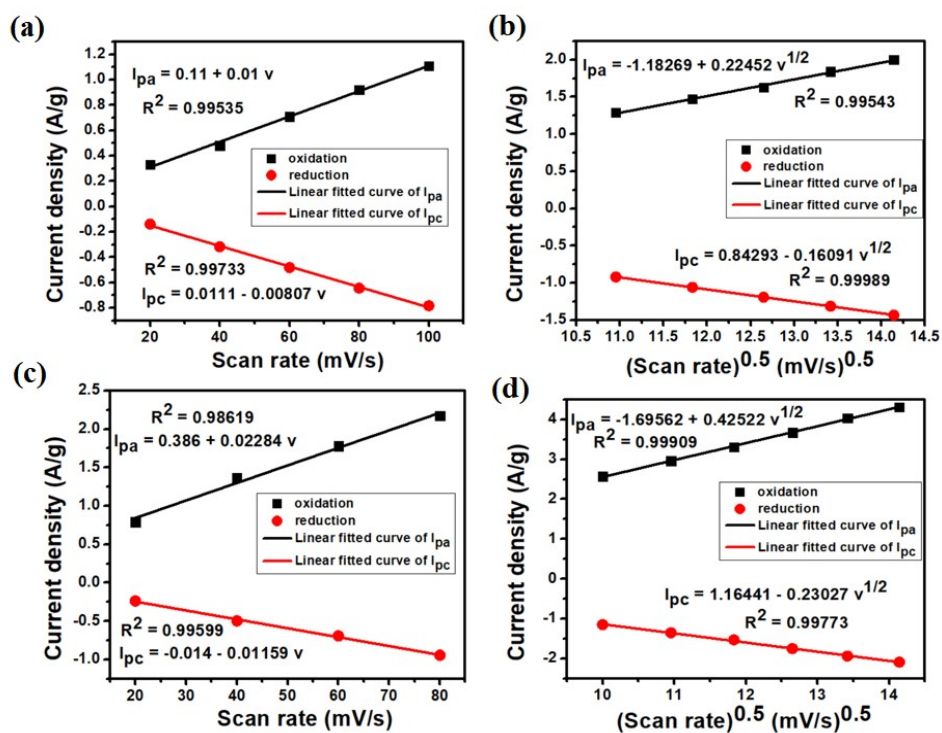

Figure S4: Plot of (a)  $I_p$  vs.  $v$ , (b)  $I_p$  vs.  $v^{1/2}$  of Co<sub>3</sub>O<sub>4</sub>/GC, (c)  $I_p$  vs.  $v$ , (d)  $I_p$  vs.  $v^{1/2}$  of Ti<sub>3</sub>C<sub>2</sub>/Co<sub>3</sub>O<sub>4</sub>/GC

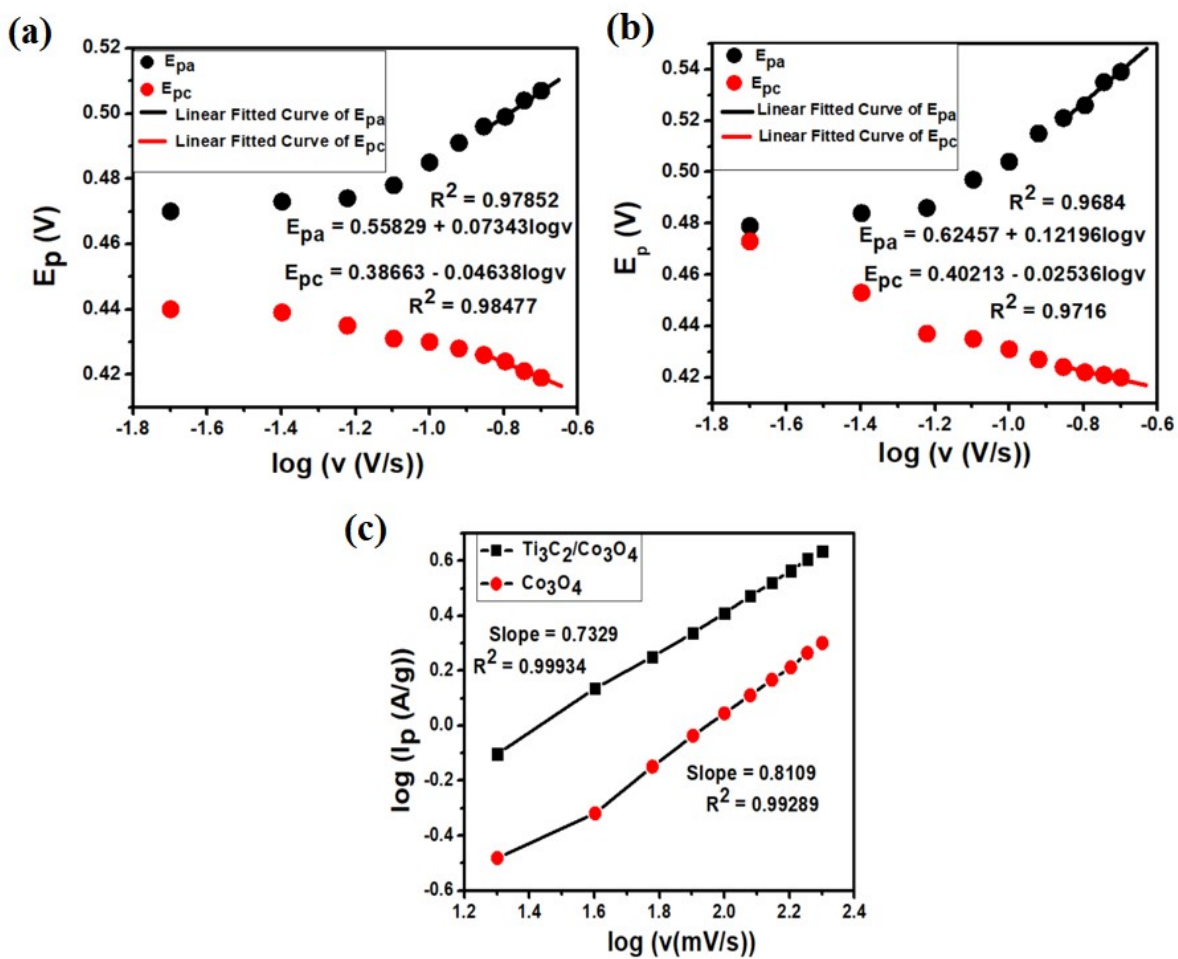

Figure S5: Laviron's plot: Anodic and cathodic peak potential ( $v$ ) vs logarithm of scan rate (a)  $\text{Co}_3\text{O}_4/\text{GC}$ , (b)  $\text{TC}/\text{GC}$ , (c) Plot of logarithm of peak anode current density vs. logarithm of scan rate

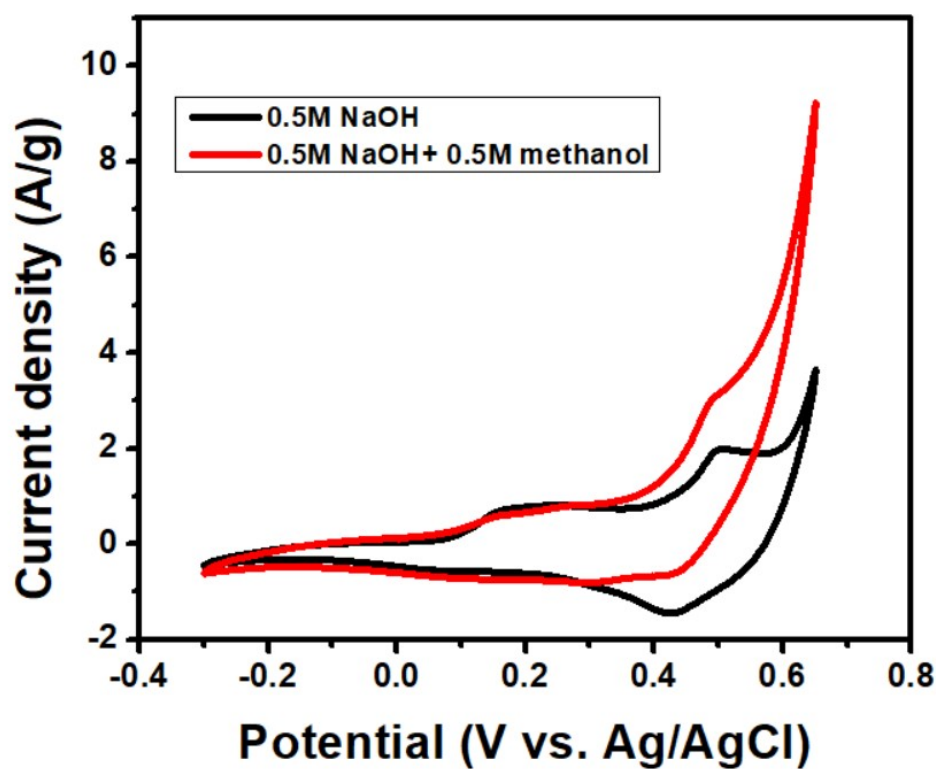

Figure S6: Cyclic voltammetry of  $\text{Co}_3\text{O}_4/\text{GC}$  in 0.5M NaOH supporting electrolyte in the presence and absence of 1.5M methanol at 200 mV/s.

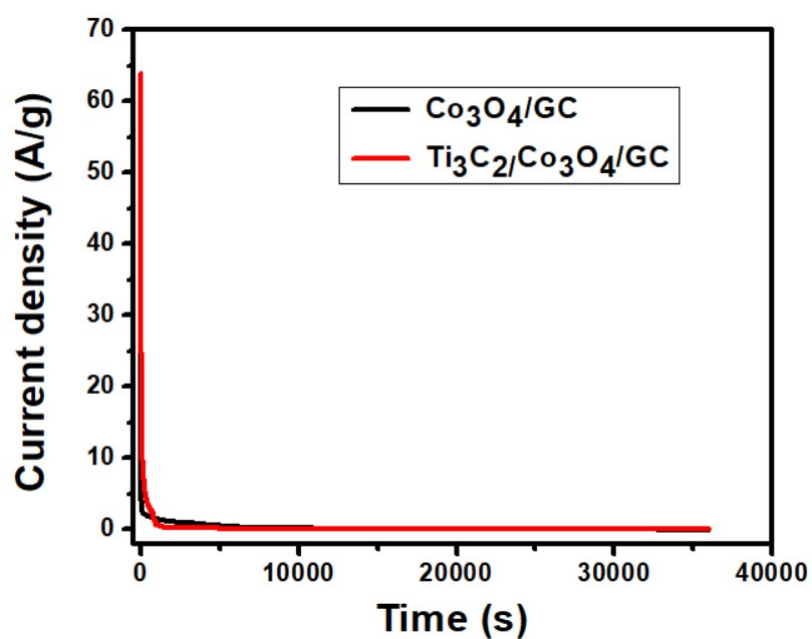

Figure S7: Chronoamperogram of  $\text{Co}_3\text{O}_4/\text{GC}$  and  $\text{Ti}_3\text{C}_2/\text{Co}_3\text{O}_4/\text{GC}$  electrodes in 0.5 M NaOH aqueous solution containing 1.5 M methanol at 0.65 V for 10 hours



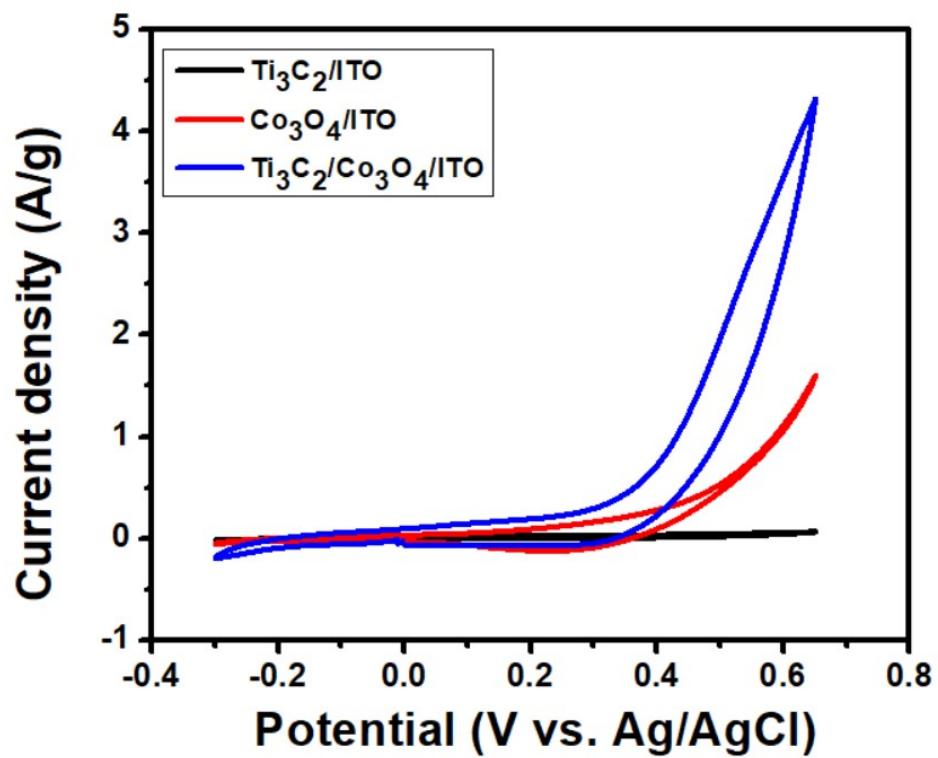

Figure S8: Cyclic voltammogram of  $\text{Ti}_3\text{C}_2/\text{ITO}$ ,  $\text{Co}_3\text{O}_4/\text{ITO}$  and  $\text{Ti}_3\text{C}_2/\text{Co}_3\text{O}_4/\text{ITO}$  in presence of 1.5 M methanol in 0.5 M NaOH supporting electrolyte at 20 mV/s scan rate.
